# Supplementary material for: Computational Analysis of the Soluble Form of the Intracellular Chloride Ion Channel Protein CLIC1
Source: Biomed Res Int. 2013 Sep 8;2013:170586. doi: 10.1155/2013/170586 (PMC3780514; doi:10.1155/2013/170586)
Supplement: Supplementary file 1 — Suppl. Table 1 details contributions to the ionisation energy of residue C24 at pH7. There are an additional eight Supplementary Figures, most of which have several panels. These figures describe: the time course of conformational changes during the simulations; the rotation of crucial residues; the prediction of phosphorylation sites; protein-ligand interactions; conformational changes that accompany ligand release; secondary structure within the foot loop; and sequence variability within CLIC proteins. The table and figures have explanatory legends and they are discussed throughout the paper. [file 170586.f1.zip]

Archive with 12 entries (10 files):
- 170586.f1/
- 170586.f1/clic_supplfigs_amg_2738_563296.pdf
- 170586.f1/CLIC_Suppl_Tble_1.pdf
- 170586.f1/S1.mov
- 170586.f1/S2.mov
- 170586.f1/S3.mov
- 170586.f1/S4.mov
- 170586.f1/__MACOSX/
- 170586.f1/__MACOSX/._S1.mov
- 170586.f1/__MACOSX/._S2.mov
- 170586.f1/__MACOSX/._S3.mov
- 170586.f1/__MACOSX/._S4.mov
